# Supplementary material for: Impact of runoff schemes on global flow discharge: a comprehensive analysis using the Noah-MP and CaMa-Flood models
Source: Copernicus journal article supplement (doi:10.5194/hess-29-1221-2025), 2025-03-04
Supplement: Supplementary file 1 [file hess-29-1221-2025-supplement.pdf]

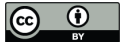

*Supplement of*

## **Impact of runoff schemes on global flow discharge: a comprehensive analysis using the Noah-MP and CaMa-Flood models**

**Mohamed Hamitouche et al.**

*Correspondence to:* Mohamed Hamitouche ([mohamed.hamitouche@iusspavia.it](mailto:mohamed.hamitouche@iusspavia.it))

The copyright of individual parts of the supplement might differ from the article licence.

**Table S1: Geophysical and vegetative characteristics (CaMa-Flood slope and Noah-MP soil and land cover types) of the selected global river basins.**

| Basin           | Drainage area (km <sup>2</sup> ) | Mean Slope (%) | Dominant Soil Texture | Dominant Land Cover          |
|-----------------|----------------------------------|----------------|-----------------------|------------------------------|
| Yukon           | 824794.7                         | 1.0            | Loam                  | Evergreen Needleleaf Forest  |
| Mackenzie       | 1698403.9                        | 0.7            | Sandy Loam            | Evergreen Needleleaf Forest  |
| Fraser          | 216563.0                         | 2.0            | Loam                  | Evergreen Needleleaf Forest  |
| Columbia        | 652359.5                         | 1.9            | Silt Loam             | Evergreen Needleleaf Forest  |
| Mississippi     | 2918820.0                        | 0.4            | Silt Loam             | Grasslands                   |
| Pearl           | 16920.2                          | 0.1            | Sandy Loam            | Woody Savannas               |
| Orinoco         | 821894.3                         | 0.7            | Clay Loam             | Evergreen Broadleaf Forest   |
| Amazon          | 4671461.8                        | 0.7            | Loam                  | Evergreen Broadleaf Forest   |
| Tocantins       | 759793.1                         | 0.4            | Clay                  | Savannas                     |
| Parnaiba        | 298405.3                         | 0.5            | Sandy Clay Loam       | Savannas                     |
| Parana          | 2520777.8                        | 0.5            | Loam                  | Savannas                     |
| Uruguay         | 242692.5                         | 0.5            | Clay                  | Grasslands                   |
| Ebro            | 84016.4                          | 1.3            | Loam                  | Croplands                    |
| Rhone           | 92923.2                          | 1.8            | Loam                  | Croplands                    |
| Rhine           | 159337.8                         | 0.9            | Loam                  | Mixed Forests                |
| Po              | 72020.4                          | 1.9            | Clay Loam             | Croplands                    |
| Elbe            | 131118.4                         | 0.5            | Loam                  | Croplands                    |
| Danube          | 777784.1                         | 0.8            | Loam                  | Croplands                    |
| Onega           | 63044.8                          | 0.2            | Silt Loam             | Mixed Forests                |
| Severnaya Dvina | 343794.8                         | 0.2            | Silt Loam             | Mixed Forests                |
| Volga           | 1366093.1                        | 0.2            | Loam                  | Mixed Forests                |
| Don             | 380598.0                         | 0.2            | Loam                  | Croplands                    |
| Chelif          | 44326.5                          | 0.9            | Loam                  | Open Shrublands              |
| Niger           | 2061636.3                        | 0.3            | Loam                  | Barren or Sparsely Vegetated |
| Lake Chad       | 601365.3                         | 0.3            | Loam                  | Savannas                     |
| Congo           | 3619085.4                        | 0.4            | Sandy Loam            | Woody Savannas               |
| Okavango        | 229666.2                         | 0.3            | Sandy Loam            | Savannas                     |
| Limpopo         | 258770.3                         | 0.5            | Sandy Loam            | Savannas                     |
| Orange          | 784762.9                         | 0.5            | Sandy Loam            | Open Shrublands              |
| Ob              | 2454226.9                        | 0.4            | Loam                  | Mixed Forests                |

|                |           |     |                 |                             |
|----------------|-----------|-----|-----------------|-----------------------------|
| Yenisey        | 2431664.8 | 0.8 | Silt Loam       | Mixed Forests               |
| Lena           | 2458634.9 | 0.7 | Silt Loam       | Deciduous Needleleaf Forest |
| Indigirka      | 304905.7  | 1.0 | Loam            | Wooded Tundra               |
| Kolyma         | 422146.8  | 0.7 | Silt Loam       | Open Shrublands             |
| Anadyr         | 106004.5  | 0.6 | Loam            | Wooded Tundra               |
| Amur           | 1877929.1 | 0.5 | Loam            | Mixed Forests               |
| Amu Darya      | 282058.5  | 3.6 | Loam            | Grasslands                  |
| Yellow         | 293382.1  | 1.5 | Loam            | Grasslands                  |
| Ganges         | 941568.4  | 1.3 | Loam            | Croplands                   |
| Irrawaddy      | 361561.6  | 1.6 | Clay Loam       | Evergreen Broadleaf Forest  |
| Mekong         | 637746.5  | 1.3 | Clay Loam       | Evergreen Broadleaf Forest  |
| Yangtze        | 1677763.7 | 1.8 | Clay Loam       | Mixed Forests               |
| Murray-Darling | 754963.3  | 0.4 | Sandy Clay Loam | Open Shrublands             |

**Text S1:**

- 5 Table S1 shows that sandy loam, sandy clay loam, loam, silt loam, clay loam, and clay are the most dominant soil textures, with loam covering nearly 50% of the basins. In terms of land cover, 40% of the basins are dominated by forests, while the others are primarily covered by shrublands, savannas, grasslands, croplands, barren or sparsely vegetated areas, and wooded tundra. The maximum mean slope is generally below 5%, with a maximum slope of 27%.

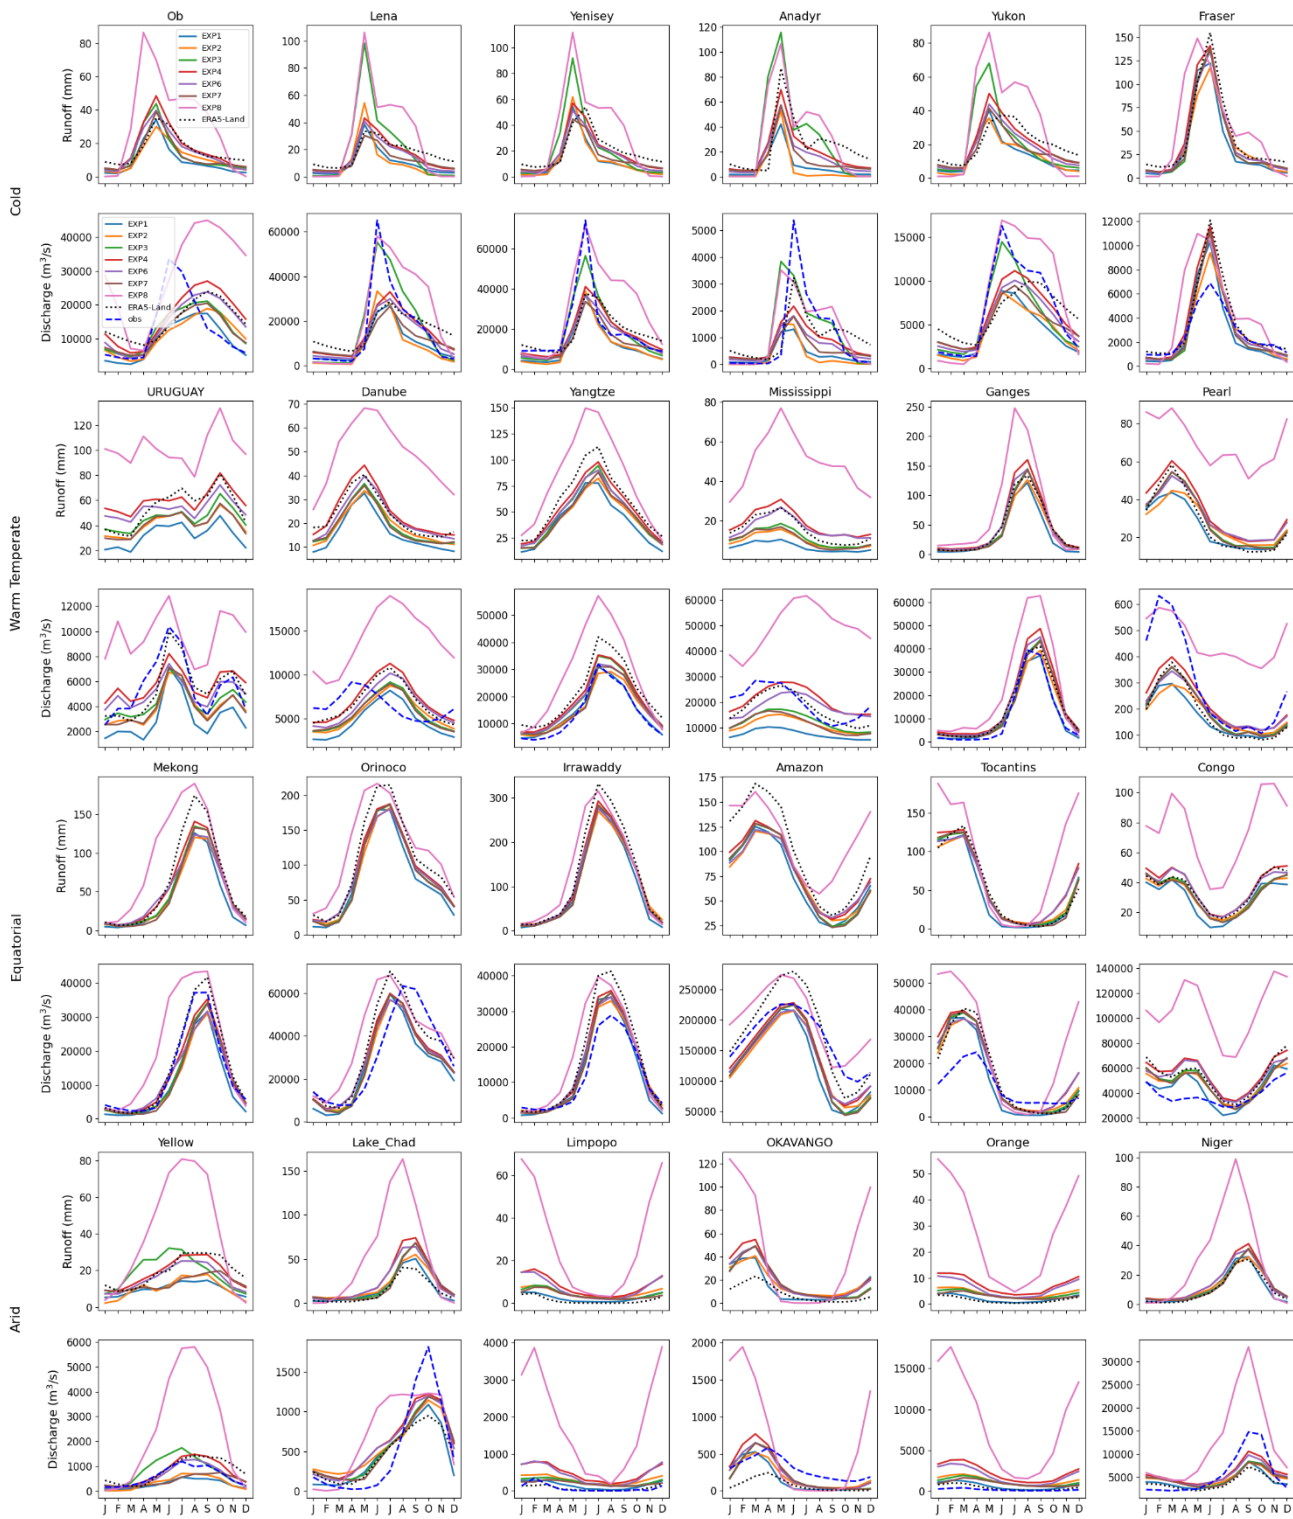

**Figure S1: Mean seasonal cycle of runoff (mm) and river discharge (m3/s) simulated by the different Noah-MP runoff schemes and CaMa-Flood, for 24 selected river basins representing four climate regions: top to bottom, rows are for cold, warm temperate, equatorial and arid regions. Discharge data includes simulated and observed values (obs) for the period 1985–2023. Observation years contributing to the monthly mean vary depending on their availability, with a minimum of 5 years per catchment.**

15

**Table S2: Correlation coefficient of each experiment across different basins.**

| Basin           | EXP1 | EXP2 | EXP3 | EXP4 | EXP6 | EXP7 | EXP8 | ERA5-Land |
|-----------------|------|------|------|------|------|------|------|-----------|
| Yukon           | 0.90 | 0.91 | 0.88 | 0.88 | 0.88 | 0.84 | 0.89 | 0.69      |
| Mackenzie       | 0.81 | 0.67 | 0.70 | 0.87 | 0.87 | 0.88 | 0.74 | 0.62      |
| Fraser          | 0.91 | 0.94 | 0.92 | 0.93 | 0.93 | 0.92 | 0.81 | 0.94      |
| Columbia        | 0.57 | 0.55 | 0.55 | 0.61 | 0.59 | 0.56 | 0.64 | 0.62      |
| Mississippi     | 0.81 | 0.67 | 0.70 | 0.87 | 0.87 | 0.88 | 0.74 | 0.62      |
| Pearl           | 0.71 | 0.64 | 0.65 | 0.70 | 0.69 | 0.65 | 0.57 | 0.69      |
| Orinoco         | 0.79 | 0.87 | 0.85 | 0.83 | 0.84 | 0.85 | 0.68 | 0.83      |
| Amazon          | 0.87 | 0.94 | 0.93 | 0.92 | 0.91 | 0.93 | 0.83 | 0.95      |
| Tocantins       | 0.84 | 0.90 | 0.88 | 0.86 | 0.86 | 0.88 | 0.63 | 0.91      |
| Parnaiba        | 0.83 | 0.88 | 0.83 | 0.88 | 0.88 | 0.82 | 0.70 | 0.86      |
| Parana          | 0.67 | 0.72 | 0.73 | 0.70 | 0.67 | 0.72 | 0.54 | 0.72      |
| Uruguay         | 0.77 | 0.79 | 0.81 | 0.81 | 0.81 | 0.80 | 0.72 | 0.82      |
| Ebro            | 0.41 | 0.57 | 0.53 | 0.62 | 0.53 | 0.54 | 0.32 | 0.59      |
| Rhone           | 0.48 | 0.44 | 0.46 | 0.50 | 0.46 | 0.47 | 0.42 | 0.60      |
| Rhine           | 0.50 | 0.51 | 0.49 | 0.63 | 0.56 | 0.53 | 0.56 | 0.69      |
| Po              | 0.71 | 0.67 | 0.65 | 0.71 | 0.69 | 0.67 | 0.63 | 0.70      |
| Elbe            | 0.69 | 0.75 | 0.68 | 0.76 | 0.69 | 0.73 | 0.36 | 0.73      |
| Danube          | 0.29 | 0.23 | 0.29 | 0.34 | 0.27 | 0.32 | 0.28 | 0.34      |
| Onega           | 0.81 | 0.70 | 0.64 | 0.78 | 0.79 | 0.68 | 0.86 | 0.53      |
| Severnaya Dvina | 0.86 | 0.69 | 0.69 | 0.78 | 0.79 | 0.71 | 0.88 | 0.56      |
| Volga           | 0.45 | 0.42 | 0.41 | 0.43 | 0.45 | 0.45 | 0.34 | 0.29      |
| Don             | 0.49 | 0.40 | 0.39 | 0.37 | 0.38 | 0.41 | 0.30 | 0.33      |
| Chelif          | 0.59 | 0.61 | 0.49 | 0.63 | 0.66 | 0.20 | 0.58 | 0.63      |
| Niger           | 0.83 | 0.81 | 0.74 | 0.83 | 0.84 | 0.72 | 0.87 | 0.81      |
| Lake Chad       | 0.81 | 0.85 | 0.83 | 0.80 | 0.81 | 0.83 | 0.54 | 0.84      |
| Congo           | 0.49 | 0.46 | 0.48 | 0.48 | 0.44 | 0.50 | 0.56 | 0.50      |

|                |      |      |      |      |      |      |      |      |
|----------------|------|------|------|------|------|------|------|------|
| Okavango       | 0.68 | 0.79 | 0.82 | 0.78 | 0.81 | 0.82 | 0.32 | 0.84 |
| Limpopo        | 0.44 | 0.45 | 0.40 | 0.51 | 0.55 | 0.23 | 0.56 | 0.56 |
| Orange         | 0.53 | 0.62 | 0.58 | 0.61 | 0.56 | 0.56 | 0.38 | 0.61 |
| Ob             | 0.73 | 0.50 | 0.70 | 0.48 | 0.53 | 0.62 | 0.35 | 0.30 |
| Yenisey        | 0.83 | 0.85 | 0.83 | 0.72 | 0.74 | 0.72 | 0.73 | 0.61 |
| Lena           | 0.81 | 0.86 | 0.87 | 0.79 | 0.81 | 0.75 | 0.82 | 0.70 |
| Indigirka      | 0.62 | 0.47 | 0.76 | 0.80 | 0.79 | 0.60 | 0.76 | 0.64 |
| Kolyma         | 0.74 | 0.70 | 0.79 | 0.76 | 0.79 | 0.72 | 0.76 | 0.74 |
| Anadyr         | 0.51 | 0.39 | 0.53 | 0.70 | 0.68 | 0.66 | 0.55 | 0.84 |
| Amur           | 0.90 | 0.94 | 0.76 | 0.96 | 0.96 | 0.87 | 0.92 | 0.77 |
| Amu Darya      | 0.64 | 0.65 | 0.63 | 0.69 | 0.68 | 0.67 | 0.52 | 0.72 |
| Yellow         | 0.76 | 0.75 | 0.76 | 0.82 | 0.83 | 0.60 | 0.77 | 0.73 |
| Ganges         | 0.89 | 0.88 | 0.87 | 0.89 | 0.89 | 0.86 | 0.89 | 0.89 |
| Irrawaddy      | 0.95 | 0.97 | 0.97 | 0.96 | 0.96 | 0.97 | 0.86 | 0.96 |
| Mekong         | 0.97 | 0.95 | 0.94 | 0.96 | 0.94 | 0.94 | 0.84 | 0.97 |
| Yangtze        | 0.95 | 0.94 | 0.95 | 0.96 | 0.95 | 0.93 | 0.87 | 0.96 |
| Murray-Darling | 0.77 | 0.71 | 0.68 | 0.66 | 0.63 | 0.68 | 0.39 | 0.76 |

**Table S3: Mean absolute error (m<sup>3</sup>/s) of each experiment across different basins.**

| Basin       | EXP1    | EXP2    | EXP3    | EXP4    | EXP6    | EXP7    | EXP8    | ERA5-Land |
|-------------|---------|---------|---------|---------|---------|---------|---------|-----------|
| Yukon       | 2824.1  | 2818.5  | 1872.1  | 2066.7  | 2151.8  | 2744.2  | 2625.5  | 3129.2    |
| Mackenzie   | 4161.5  | 3990.4  | 3153.2  | 2707.0  | 2582.2  | 3019.2  | 8790.9  | 3374.7    |
| Fraser      | 1206.1  | 777.0   | 1077.6  | 1087.9  | 971.2   | 1042.0  | 2162.8  | 1076.1    |
| Columbia    | 4187.6  | 3491.5  | 4203.2  | 4072.5  | 3720.2  | 4171.5  | 5828.1  | 3738.0    |
| Mississippi | 12434.8 | 9131.1  | 7933.4  | 5972.0  | 6505.8  | 8560.8  | 29357.2 | 5172.6    |
| Pearl       | 154.3   | 163.1   | 158.5   | 148.7   | 152.4   | 159.5   | 259.8   | 158.6     |
| Orinoco     | 11108.0 | 7928.9  | 8821.1  | 9073.9  | 8979.3  | 8869.9  | 13659.5 | 9352.6    |
| Amazon      | 40517.6 | 36792.1 | 36749.4 | 28587.2 | 32665.9 | 37239.4 | 40319.2 | 29266.8   |
| Tocantins   | 8103.7  | 6425.9  | 7366.7  | 8475.7  | 7667.3  | 7725.1  | 18290.9 | 7404.4    |
| Parnaiba    | 493.7   | 465.9   | 467.8   | 428.6   | 436.1   | 472.6   | 783.7   | 510.9     |
| Parana      | 5617.5  | 4787.6  | 5342.0  | 9496.3  | 7762.9  | 5336.2  | 29694.7 | 5648.0    |
| Uruguay     | 2775.8  | 2118.2  | 2001.1  | 1987.5  | 1914.8  | 2114.8  | 4480.1  | 1833.5    |

|                 |         |         |         |         |         |         |         |         |
|-----------------|---------|---------|---------|---------|---------|---------|---------|---------|
| Ebro            | 179.9   | 135.8   | 145.7   | 208.8   | 185.4   | 147.4   | 960.6   | 154.8   |
| Rhone           | 807.5   | 720.7   | 735.5   | 715.9   | 738.8   | 729.1   | 1249.6  | 660.3   |
| Rhine           | 802.7   | 696.5   | 688.6   | 647.8   | 663.1   | 670.7   | 1687.1  | 695.2   |
| Po              | 618.4   | 564.2   | 555.7   | 535.7   | 547.6   | 541.1   | 882.5   | 557.3   |
| Elbe            | 404.0   | 250.8   | 262.1   | 224.0   | 222.1   | 265.4   | 1284.5  | 271.8   |
| Danube          | 2755.0  | 2554.5  | 2536.7  | 2566.7  | 2522.6  | 2480.4  | 7620.4  | 2508.2  |
| Onega           | 224.7   | 273.2   | 268.5   | 241.6   | 237.8   | 258.3   | 396.2   | 375.5   |
| Severnaya Dvina | 1196.6  | 1590.4  | 1584.5  | 1422.6  | 1392.5  | 1580.3  | 2318.2  | 2265.5  |
| Volga           | 4191.5  | 3676.9  | 4096.1  | 4491.8  | 4071.1  | 3933.9  | 12341.9 | 4712.1  |
| Don             | 385.4   | 322.3   | 417.0   | 1038.6  | 673.7   | 406.7   | 3467.2  | 405.1   |
| Chelif          | 8.6     | 26.0    | 16.9    | 65.2    | 54.5    | 15.7    | 364.4   | 8.3     |
| Niger           | 2418.8  | 2690.6  | 2757.3  | 2590.3  | 2507.3  | 2800.2  | 6657.5  | 2552.1  |
| Lake Chad       | 270.0   | 300.5   | 268.4   | 295.4   | 284.5   | 261.0   | 458.4   | 265.7   |
| Congo           | 13990.0 | 14716.1 | 15854.8 | 19240.4 | 16843.2 | 15612.4 | 67335.5 | 19516.3 |
| Okavango        | 181.8   | 135.7   | 156.1   | 159.6   | 146.3   | 157.6   | 613.8   | 223.6   |
| Limpopo         | 141.8   | 271.9   | 227.0   | 431.7   | 388.6   | 203.9   | 1727.0  | 71.0    |
| Orange          | 505.1   | 1105.4  | 952.8   | 2095.1  | 1698.4  | 803.5   | 8119.5  | 304.3   |
| Ob              | 5623.7  | 6777.0  | 5825.9  | 8640.8  | 7446.2  | 6189.2  | 17824.1 | 9379.3  |
| Yenisey         | 8521.4  | 8666.3  | 7468.7  | 7377.4  | 7463.8  | 7692.7  | 14922.4 | 8718.5  |
| Lena            | 7760.5  | 7897.6  | 5934.9  | 7514.8  | 6782.2  | 8990.6  | 10389.7 | 10181.4 |
| Indigirka       | 1539.4  | 1525.9  | 1283.1  | 1365.6  | 1342.7  | 1670.7  | 1278.5  | 1432.1  |
| Kolyma          | 2463.2  | 2568.0  | 1961.3  | 2047.8  | 1861.8  | 2419.5  | 2369.6  | 2402.7  |
| Anadyr          | 904.5   | 975.0   | 802.7   | 775.3   | 784.5   | 862.2   | 825.2   | 685.0   |
| Amur            | 3998.6  | 2912.7  | 3864.8  | 2525.8  | 2067.1  | 4107.0  | 14174.3 | 4429.4  |
| Amu Darya       | 1049.7  | 1025.3  | 961.6   | 916.4   | 960.0   | 975.6   | 988.5   | 921.5   |
| Yellow          | 327.3   | 318.1   | 314.9   | 248.8   | 194.5   | 282.0   | 1956.7  | 375.4   |
| Ganges          | 3753.2  | 4817.2  | 5191.9  | 6304.0  | 5241.0  | 5042.6  | 11933.1 | 5050.7  |
| Irrawaddy       | 3530.6  | 2449.5  | 2933.8  | 3408.3  | 3179.7  | 2907.7  | 6727.8  | 5001.3  |
| Mekong          | 3765.6  | 3504.4  | 3227.1  | 2641.9  | 3296.5  | 3514.3  | 8390.6  | 2658.7  |
| Yangtze         | 2455.0  | 3156.9  | 4330.4  | 4874.2  | 3867.9  | 3698.6  | 14401.5 | 7394.9  |
| Murray-Darling  | 346.7   | 778.1   | 687.6   | 1376.7  | 1183.1  | 616.0   | 3832.2  | 316.3   |

20 **Table S4: Root mean squared error (m3/s) of each experiment across different basins.**

| Basin           | EXP1    | EXP2    | EXP3    | EXP4    | EXP6    | EXP7    | EXP8    | ERA5-Land |
|-----------------|---------|---------|---------|---------|---------|---------|---------|-----------|
| Yukon           | 4218.0  | 4178.4  | 2891.4  | 3214.7  | 3493.1  | 4054.7  | 3423.1  | 4292.4    |
| Mackenzie       | 5604.8  | 5886.8  | 4702.7  | 3763.6  | 3961.5  | 4590.2  | 9845.7  | 5081.1    |
| Fraser          | 1851.7  | 1233.6  | 1865.7  | 1982.5  | 1712.9  | 1813.3  | 3175.8  | 2012.6    |
| Columbia        | 5401.1  | 4636.0  | 5880.9  | 6261.6  | 5398.8  | 5815.6  | 8188.3  | 5796.1    |
| Mississippi     | 14855.4 | 11644.0 | 10397.8 | 7408.8  | 8140.6  | 10854.1 | 32301.2 | 6789.8    |
| Pearl           | 289.5   | 308.8   | 294.4   | 272.5   | 286.2   | 293.6   | 346.5   | 286.5     |
| Orinoco         | 13864.2 | 10622.5 | 11621.7 | 11713.8 | 11550.2 | 11688.8 | 18449.0 | 12958.3   |
| Amazon          | 51867.0 | 42683.3 | 45321.6 | 37618.6 | 40467.5 | 46105.6 | 44036.7 | 35919.0   |
| Tocantins       | 11582.2 | 9476.9  | 11150.4 | 12046.7 | 10577.7 | 11546.1 | 24036.2 | 11412.1   |
| Parnaiba        | 588.5   | 531.0   | 569.3   | 512.8   | 504.4   | 573.4   | 1238.7  | 584.9     |
| Parana          | 6579.2  | 5875.5  | 6670.7  | 10814.0 | 9099.2  | 6582.1  | 31622.9 | 6942.4    |
| Uruguay         | 3811.3  | 3322.3  | 3059.8  | 2716.5  | 2767.1  | 3231.9  | 5360.0  | 2572.7    |
| Ebro            | 291.2   | 228.7   | 243.3   | 286.1   | 272.5   | 243.5   | 1330.4  | 238.6     |
| Rhone           | 1079.2  | 1024.1  | 1046.0  | 1021.6  | 1036.3  | 1030.3  | 1735.0  | 935.2     |
| Rhine           | 1139.5  | 1047.0  | 1073.7  | 924.2   | 973.6   | 1032.4  | 2098.4  | 940.3     |
| Po              | 810.8   | 792.1   | 826.8   | 753.5   | 767.5   | 797.7   | 1116.5  | 776.2     |
| Elbe            | 536.1   | 389.5   | 395.9   | 296.6   | 317.4   | 388.6   | 1482.9  | 371.0     |
| Danube          | 3389.0  | 3126.4  | 3134.9  | 3245.5  | 3111.9  | 3074.6  | 8728.1  | 3135.8    |
| Onega           | 450.9   | 558.1   | 558.9   | 458.5   | 477.9   | 538.0   | 526.0   | 603.1     |
| Severnaya Dvina | 2559.2  | 3466.3  | 3318.1  | 2867.1  | 2973.8  | 3290.8  | 2901.3  | 3679.6    |
| Volga           | 5610.0  | 5096.4  | 5605.3  | 6352.5  | 5399.8  | 5366.2  | 14665.1 | 7016.9    |
| Don             | 461.5   | 449.4   | 581.5   | 1305.4  | 868.2   | 564.8   | 3808.8  | 564.3     |
| Chelif          | 26.5    | 30.4    | 25.6    | 76.8    | 79.2    | 27.3    | 571.7   | 22.0      |
| Niger           | 3623.4  | 3611.0  | 3606.4  | 3125.3  | 3182.5  | 3686.3  | 8735.6  | 3953.9    |
| Lake Chad       | 434.9   | 435.7   | 420.9   | 442.2   | 437.2   | 417.7   | 625.4   | 443.2     |
| Congo           | 17360.1 | 18004.9 | 19599.2 | 24039.1 | 21214.8 | 19308.4 | 71054.2 | 24949.9   |
| Okavango        | 220.8   | 165.0   | 186.2   | 206.8   | 177.4   | 188.3   | 904.4   | 250.3     |
| Limpopo         | 252.8   | 329.3   | 299.1   | 508.1   | 493.4   | 294.7   | 2623.6  | 221.2     |
| Orange          | 703.0   | 1241.0  | 1132.1  | 2466.5  | 2077.3  | 988.2   | 11380.1 | 526.9     |
| Ob              | 8580.3  | 9719.9  | 7877.0  | 10449.5 | 9503.8  | 8724.5  | 21551.6 | 10983.4   |



|                |         |         |         |         |         |         |         |         |
|----------------|---------|---------|---------|---------|---------|---------|---------|---------|
| Yenisey        | 16931.2 | 15981.2 | 12737.2 | 16505.7 | 17027.3 | 18195.0 | 19439.4 | 18273.9 |
| Lena           | 15708.4 | 14044.2 | 10521.1 | 14274.8 | 14293.4 | 16450.9 | 14694.8 | 16147.4 |
| Indigirka      | 2625.9  | 2676.9  | 2129.5  | 1970.1  | 2109.6  | 2502.0  | 2083.2  | 2046.1  |
| Kolyma         | 4813.5  | 4697.0  | 3333.4  | 3912.8  | 3995.2  | 4538.1  | 3681.7  | 3789.4  |
| Anadyr         | 1716.6  | 1792.6  | 1621.3  | 1401.2  | 1493.5  | 1541.7  | 1570.1  | 1059.3  |
| Amur           | 5732.7  | 4235.4  | 5041.6  | 3003.9  | 2677.2  | 5156.8  | 18007.6 | 5198.0  |
| Amu Darya      | 1280.9  | 1253.6  | 1183.0  | 1127.0  | 1169.5  | 1184.7  | 1283.8  | 1110.3  |
| Yellow         | 459.5   | 434.6   | 489.7   | 375.2   | 304.6   | 438.9   | 2835.4  | 499.6   |
| Ganges         | 7067.1  | 7519.6  | 8449.8  | 9400.9  | 8200.2  | 8456.7  | 16541.4 | 7862.2  |
| Irrawaddy      | 4912.0  | 3754.5  | 4502.1  | 5049.0  | 4544.7  | 4455.9  | 9849.0  | 7780.2  |
| Mekong         | 5424.3  | 5851.0  | 5206.0  | 4278.3  | 5493.5  | 5558.7  | 11708.0 | 3891.8  |
| Yangtze        | 3598.1  | 4098.9  | 5297.3  | 5673.4  | 4601.3  | 4665.4  | 18168.0 | 8325.8  |
| Murray-Darling | 373.7   | 823.6   | 763.8   | 1471.0  | 1264.6  | 699.8   | 4060.3  | 364.8   |

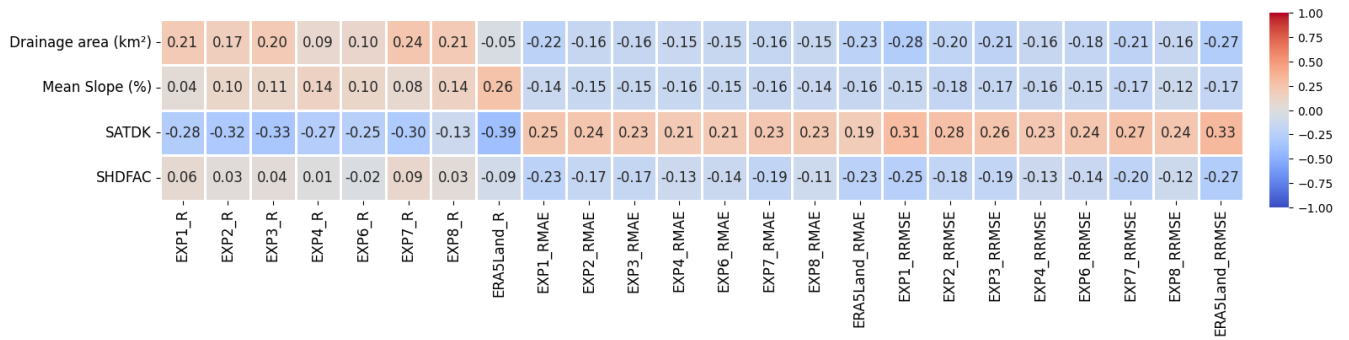

25 **Figure S2: Correlation heatmap between experiment performances (R, RMAE, RRMSE) and geophysical and vegetative properties including drainage area, mean slope, saturated soil hydraulic conductivity (SATDK), and vegetation fraction (SHDFAC).**

**Text S2:**

To evaluate the correlation between experiment performances and soil/vegetation types, we used saturated soil hydraulic conductivity (SATDK) and vegetation fraction (SHDFAC) as representative quantitative values. This allowed us to perform a meaningful correlation analysis, as soil type and vegetation are typically categorical and not directly correlatable.

30 Larger basins tend to have higher discharge magnitudes, which can naturally lead to larger MAE and RMSE values. To account for this inherent scaling issue and to provide a more normalized assessment of model performance, Relative Mean Absolute Error (RMAE) and Relative Root Mean Squared Error (RRMSE) were calculated. This normalization is achieved by dividing the MAE and RMSE values by the mean of the observed discharge values for each basin, allowing for a more equitable comparison of model performance across basins of varying scales.

35 The heatmap illustrates the generally weak correlations between geophysical and vegetative properties and the performance of different runoff experiments. The slightly moderate negative correlation with hydraulic conductivity (SATDK) suggests that in basins with high hydraulic conductivity soils, there is a challenge in capturing the hydrograph shape accurately. This is likely because high hydraulic conductivity increases subsurface runoff at the expense of surface runoff, and the CaMa-Flood routing model does not differentiate between these two types of runoff, affecting the timing and shape of the hydrograph and thus, negatively the R coefficient and positively the bias.

40 This also supports our previous discussion on CaMa-Flood limitations.

**Table S5: Summary of relevant tuneable parameters per runoff scheme.**

| Runoff Scheme                | TOPMODEL with groundwater | TOPMODEL with an equilibrium water table | Schaake                              | BATS                     | VIC                                | XAJ                                                | Dynamic VIC                                      |
|------------------------------|---------------------------|------------------------------------------|--------------------------------------|--------------------------|------------------------------------|----------------------------------------------------|--------------------------------------------------|
| Relevant tuneable parameters | - $fsat_{max}$<br>- Bexp  | - $fsat_{max}$<br>- $F_{decay}$          | - Soil depth<br>- MAXSMC<br>- REFKDT | - Soil depth<br>- MAXSMC | - Soil depth<br>- MAXSMC<br>- BVIC | - REFSMC<br>- MAXSMC<br>- AXAJ<br>- BXAJ<br>- XXAJ | - Soil depth<br>- MAXSMC<br>- BDVIC<br>- InfBexp |

45  $fsat_{max}$ : maximum surface saturated fraction; Bexp: soil B parameter;  $F_{decay}$ : runoff decay factor; MAXSMC: saturated value of soil moisture; REFKDT: parameter in the surface runoff parameterization; BVIC: VIC model infiltration parameter; REFSMC: reference soil moisture (field capacity); AXAJ: tension water distribution inflection parameter; BXAJ: Tension water distribution shape parameter; XXAJ: Free water distribution shape parameter; BDVIC: Dynamic VIC model infiltration parameter; InfBexp: B parameter for infiltration scaling curve.
